# Supplementary figures and images for: Optical Genome Mapping Enables Detection and Accurate Sizing of RFC1 Repeat Expansions
Source: MDPI journal article supplement (doi:10.3390/biom13101546), 2023-10-19

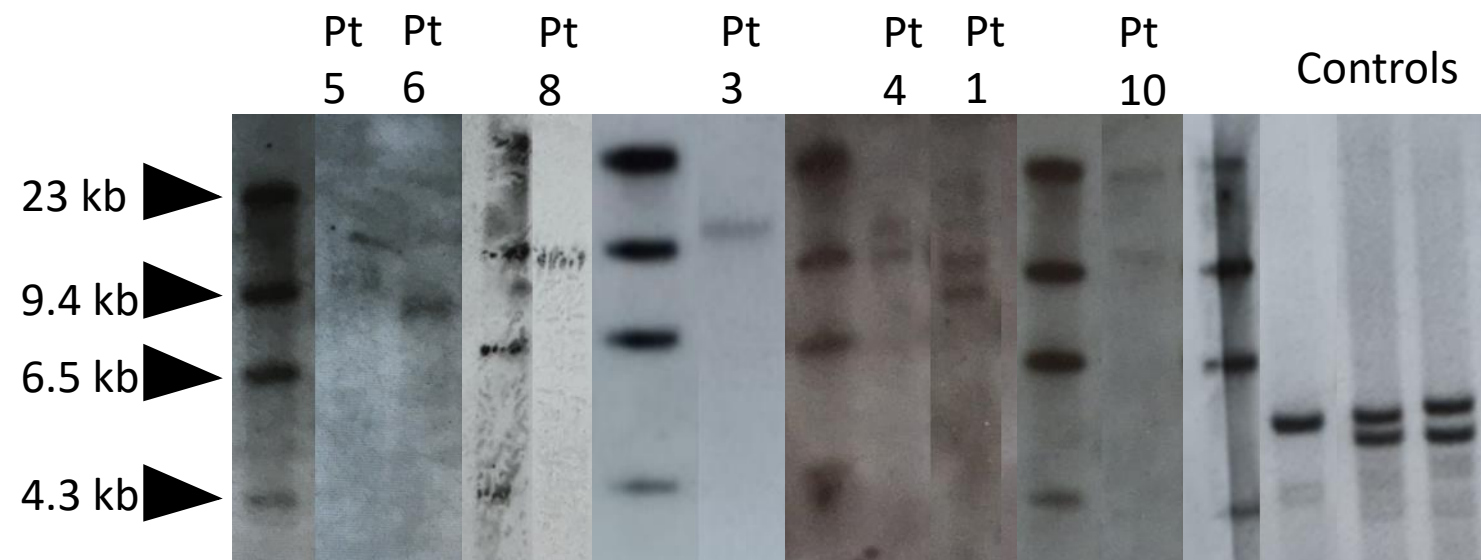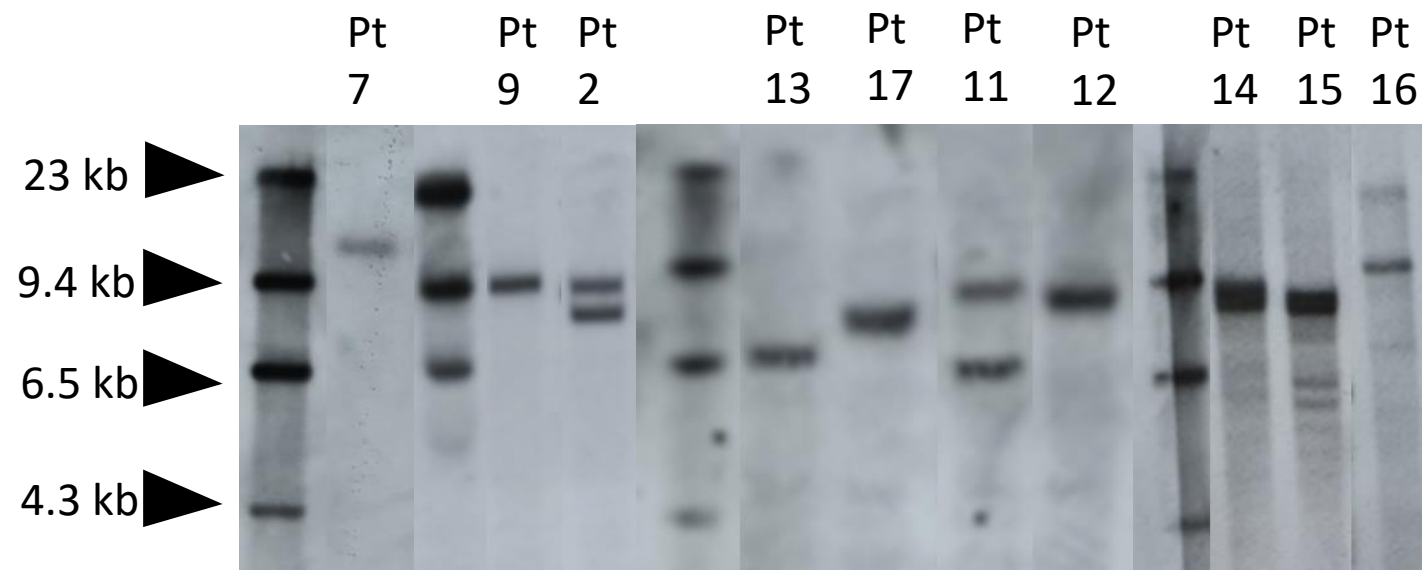

Supplement: s1 [file s1]
